# Supplementary material for: Neutrophil to Lymphocyte Ratio as a Biomarker for Predicting the Coronary Artery Abnormality in Kawasaki Disease: A Meta-Analysis
Source: Dis Markers. 2022 Oct 11;2022:6421543. doi: 10.1155/2022/6421543 (PMC9578863; doi:10.1155/2022/6421543)
Supplement: Supplementary Materials — The exact search strategy of each database is shown as supplementary file A. The list of included studies is shown in supplementary file B. [file 6421543.f1.zip]

Archive with 2 entries (2 files):
- Supplementary file A.docx
- supplementary file B.rtf
